# Supplementary material
Source: publisher figshare collection journal article supplement (https://acs.figshare.com/ndownloader/files/3943441)
Supplement: Supplementary file 1 [file 3943441]

## Hydroxyl Radical Generation from PM<sub>2.5</sub>-Associated Environmentally Persistent Free Radicals (EPFRs)

William Gehling, Lavrent Khachatryan, and Barry Dellinger\*

Louisiana State University, Department of Chemistry, Baton Rouge, LA 70803

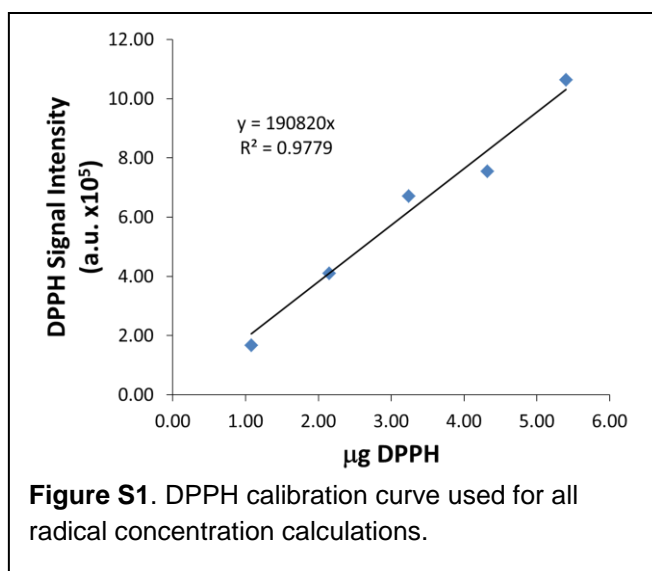

### DPPH Calibration of EPR for Quantitative

### Radical Concentration.

0.0054 g of DPPH was weighed out, placed in a 100 mL volumetric flask, and filled to the line with benzene. From this, 5 different aliquots were pipetted (20, 40, 60, 80, and 100  $\mu$ L), and placed in high purity quartz EPR tubes. The solution was dried by dry nitrogen, and the resulting powder placed under Ar as

well as sealed by critoseal. These powders were measured consecutively by EPR and plotted as the measured DPPH signal intensity ( $(\Delta H_{p-p})^2$  multiplied by the relative intensity of the peak) vs. its respective weight in  $\mu$ g, **Figure S1**. The weight of DPPH in  $\mu$ g is directly proportional to the number of radicals as one molecule of DPPH contains one radical. The slope of this curve was utilized in calculating all radical concentrations by comparison to the samples' signal intensity.

\*Barry Dellinger 338 Choppin Hall Baton Rouge, LA 70803

Phone: (225)578-6759

Email: barryd@lsu.edu

**Chelex Treatment of PM<sub>2.5</sub> samples.** In an attempt to more closely match previous studies<sup>1-4</sup>, Chelex was utilized for elimination of any trace metals present in the ultrahigh purity (UP) H<sub>2</sub>O. The manufacturer batch method for preparation was adjusted to accommodate the smaller volume employed. This involved adding approximately 1.3 g of Chelex resin to 10 mL PBS solution and mixing rigorously for 1 hour. The PBS solutions with resin were left overnight before use and filtered from solution using a Fisherbrand P5 filter paper.

After multiple attempts, the Chelex treatment did not reduce the DMPO-OH signal as expected<sup>2-6</sup>. Instead, the DMPO-OH signals increased by an average of 140%. Similar phenomena was previously observed suggesting another pathway where Chelex participates in the reaction<sup>1</sup>. To avoid any extra confounding factors, Chelex was not used in this study.

**Effect of Chelating Agents.** Using a 0.1 mM solution of DFO corresponded to a 72% reduction of the DMPO-OH signal from the PM<sub>2.5</sub> suspension and this suggests an important role for Fe in the catalysis of H<sub>2</sub>O<sub>2</sub> to •OH. Previous studies, regardless of assay type, had conflicting results from DFO. Some reports observed a substantial or nearly complete elimination of the ROS signal<sup>7-9</sup>. These studies used samples stored for long periods of time (from months to years) or were completely relying on the generation of •OH from H<sub>2</sub>O<sub>2</sub>. Therefore, these investigations were biased in favor of DFO to completely eliminate the signal by metal complexation.

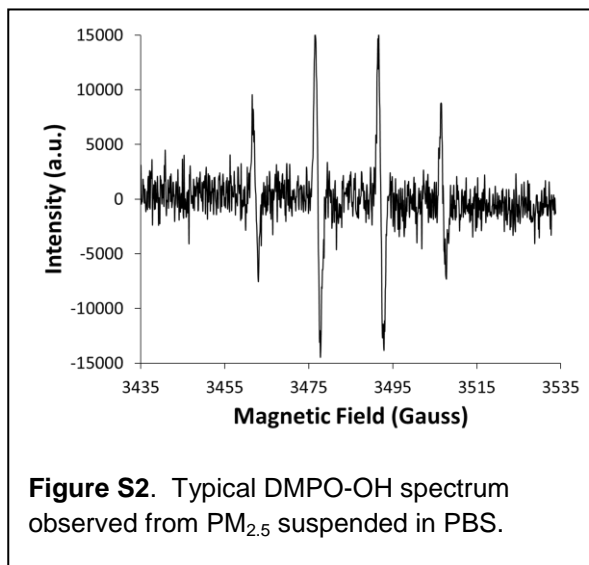

**Figure S2.** Typical DMPO-OH spectrum observed from PM<sub>2.5</sub> suspended in PBS.

Other reports only reduced the signal suggesting other pathways<sup>10-15</sup>. Recognizing DFO is very selective towards iron leaves the possibility of the other redox metals in the PM<sub>2.5</sub> to catalyze an exogenous Fenton reaction. Although the amount of the other redox active metals is minor when compared to iron, they are still present on the surface to catalyze the exogenous Fenton reaction.

Accompanying the complexation of metals, DFO was observed to scavenge the tetrachlorosemiquinone anion radical<sup>16</sup>. Such elimination would suggest a role in scavenging for other semiquinone type radicals. Either from metal complexation or eliminating the semiquinone radicals, the addition of DFO reduced the adduct intensity in these experiments.

DETAPAC exhibited unpredictable behavior in PM<sub>2.5</sub> solutions. Particularly, using DETAPAC in this work reduced the •OH signal intensity by 53% while, in contrast, a previous study exhibited a higher •OH signal<sup>17</sup>.

Based on these observations, the above reagents were not included in the spin trapping experiments for PM<sub>2.5</sub>. Instead, a comparative method<sup>33, 34</sup>, where the same sample was utilized under different conditions (air vs. N<sub>2</sub> purging, fresh vs. aged), was chosen to monitor the •OH generating capacity of ambient PM<sub>2.5</sub> particles collected from Louisiana industrial corridor.

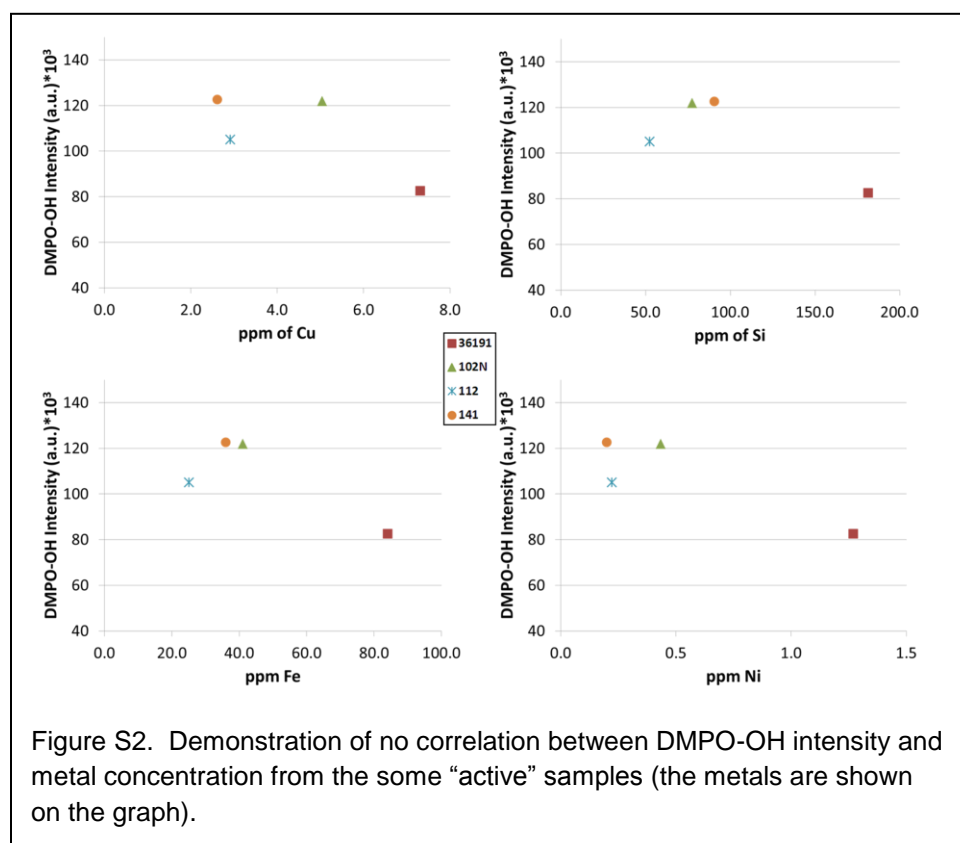

## Metal Dependence.

Previous studies report a metal association for ROS generation in PM, such as As<sup>18</sup>, Ba<sup>19</sup>, Cd<sup>18</sup>, Co<sup>5, 6, 20</sup>, Cr<sup>6, 19, 20</sup>, Cu<sup>9, 15, 19-25</sup>, Fe<sup>5-7, 20-23, 26, 27</sup>, Mn<sup>6, 20, 28</sup>, Ni<sup>5, 18</sup>, V<sup>18, 28</sup>, Zn<sup>21, 28, 29</sup>, and Zr<sup>19</sup>.

Most of the studies

listed above included the presence of reducing agents or H<sub>2</sub>O<sub>2</sub> thereby favoring the metal mediated generation of •OH. In addition to total metals, correlations suggested associations with soluble Fe<sup>7, 8, 29, 30</sup>. Soluble transition metals from PM are suggested important due to their bioavailability<sup>3, 6, 14, 28</sup>. The soluble Fe oxidation state in PM<sub>2.5</sub> also displayed no significant changes over 40 days<sup>32</sup>. However, particle bound transition metals (or the particle itself) also demonstrated increased ROS generation when compared to the soluble metals present<sup>24, 31</sup>.

Straightforward dependencies between metal content and DMPO-OH concentration were not observed in this study; although, only the total metals from a nitric acid digestion were studied. There was no investigation into the soluble metals. Using only the “active” samples, there was no correlation between the DMPO-OH intensity and individual, **Figure S3**, or total metals (not presented but similar behavior as **Figure S3**). When applying the “passive” samples as well, there were still no correlations from the metals data (data not shown).

## References

1. Li, B.; Blough, N. V.; Gutierrez, P. L., Trace detection of hydroxyl radicals during the redox cycling of low concentrations of diaziquone: a new approach. *Free Radical Biol. Med.* **2000**, *29*, 548-556.
2. Vidrio, E.; Jung, H.; Anastasio, C., Generation of hydroxyl radicals from dissolved transition metals in surrogate lung fluid solutions. *Atmos. Environ.* **2008**, *42* (18), 4369-4379.
3. DiStefano, E.; Eiguren-Fernandez, A.; Delfino, R. J.; Sioutas, C.; Froines, J. R.; Cho, A. K., Determination of metal-based hydroxyl radical generating capacity of ambient and diesel exhaust particles. *Inhal. Toxicol.* **2009**, *21* (8-11), 731-738.
4. Shen, H.; Anastasio, C., A comparison of hydroxyl radical and hydrogen peroxide generation in ambient particle extracts and laboratory metal solutions. *Atmos. Environ.* **2012**, *46* (0), 665-668.
5. Shafer, M. M.; Perkins, D. A.; Antkiewicz, D. S.; Stone, E. A.; Quraishi, T. A.; Schauer, J. J., Reactive oxygen species activity and chemical speciation of size-fractionated atmospheric particulate matter from Lahore, Pakistan: an important role for transition metals. *J. Environ. Monit.* **2010**, *12* (3), 704-715.
6. Verma, V.; Shafer, M. M.; Schauer, J. J.; Sioutas, C., Contribution of transition metals in the reactive oxygen species activity of PM emissions from retrofitted heavy-duty vehicles. *Atmos. Environ.* **2010**, *44* (39), 5165-5173.
7. Valavanidis, A.; Salika, A.; Theodoropoulou, A., Generation of hydroxyl radicals by urban suspended particulate air matter. The role of iron ions. *Atmos. Environ.* **2000**, *34* (15), 2379-2386.
8. Valavanidis, A.; Fiotakis, K.; Vlachogianni, T., The Role of Stable Free Radicals, Metals and PAHs of Airborne Particulate Matter in Mechanisms of Oxidative Stress and Carcinogenicity. . In *Urban Airborne Particulate Matter*, Zereini, F.; Wiseman, C. L. S., Eds. Springer Berlin Heidelberg: 2011; pp 411-426.
9. Shen, H.; Anastasio, C., Formation of hydroxyl radical from San Joaquin Valley particles extracted in a cell-free surrogate lung fluid. *Atmos. Chem. Phys.* **2011**, *11* (18), 9671-9682.
10. Donaldson, K.; Brown, D. M.; Mitchell, C.; Dineva, M.; Beswick, P. H.; Gilmour, P.; MacNee, W., Free radical activity of PM10: iron-mediated generation of hydroxyl radicals. *Environ Health Perspect* **1997**, *105 Suppl 5*, 1285-9.
11. Eiguren-Fernandez, A.; Shinyashiki, M.; Schmitz, D. A.; DiStefano, E.; Hinds, W.; Kumagai, Y.; Cho, A. K.; Froines, J. R., Redox and electrophilic properties of vapor- and particle-phase components of ambient aerosols. *Environ. Res.* **2010**, *110* (3), 207-212.
12. Frikke-Schmidt, H.; Roursgaard, M.; Lykkesfeldt, J.; Loft, S.; Nojgaard, J. K.; Moller, P., Effect of vitamin C and iron chelation on diesel exhaust particle and carbon black induced oxidative damage and cell adhesion molecule expression in human endothelial cells. *Toxicol Lett* **2011**, *203* (3), 181-9.
13. Jung, H.; Guo, B.; Anastasio, C.; Kennedy, I. M., Quantitative measurements of the generation of hydroxyl radicals by soot particles in a surrogate lung fluid. *Atmos. Environ.* **2006**, *40* (6), 1043-1052.
14. Antonini, J. M.; Taylor, M. D.; Leonard, S. S.; Lawryk, N. J.; Shi, X.; Clarke, R. W.; Roberts, J. R., Metal composition and solubility determine lung toxicity induced by residual oil fly ash collected from different sites within a power plant. *Mol. Cell. Biochem.* **2004**, *255*, 257-265.

15. Briede, J. J.; De Kok, T.; Hogervorst, J. G. F.; Moonen, E. J. C.; Den Camp, C.; Kleinjans, J. C. S., Development and application of an electron spin resonance spectrometry method for the determination of oxygen free radical formation by particulate matter. *Environ. Sci. Technol.* **2005**, 39 (21), 8420-8426.
16. Zhu, B.-Z.; Zhao, H.-T.; Kalyanaraman, B.; Frei, B., Metal-independent production of hydroxyl radicals by halogenated quinones and hydrogen peroxide: an ESR spin trapping study. *Free Radic. Biol. Med.* **2002**, 32 (5), 465-473.
17. Burkitt, M. J., ESR Spin Trapping Studies Into of Nature of the Oxidizing Species Formed in the Fenton Reaction: Pitfalls Associated With of Use Of 5,5-Dimethyl-1-Pyrroline-n-Oxide in the Detection of the Hydroxyl Radical. *Free Radic. Res.* **1993**, 18 (1), 43-57.
18. Verma, V.; Ning, Z.; Cho, A. K.; Schauer, J. J.; Shafer, M. M.; Sioutas, C., Redox activity of urban quasi-ultrafine particles from primary and secondary sources. *Atmos. Environ.* **2009**, 43 (40), 6360-6368.
19. Ntziachristos, L.; Froines, J. R.; Cho, A. K.; Sioutas, C., Relationship between redox activity and chemical speciation of size-fractionated particulate matter. *Particle and fibre toxicology* **2007**, 4, 5.
20. Baulig, A.; Poirault, J. J.; Ausset, P.; Schins, R.; Shi, T.; Baralle, D.; Dorlhene, P.; Meyer, M.; Lefevre, R.; Baeza-Squiban, A.; Marano, F., Physicochemical characteristics and biological activities of seasonal atmospheric particulate matter sampling in two locations of Paris. *Environ Sci Technol* **2004**, 38 (22), 5985-92.
21. Kunzli, N.; Mudway, I. S.; Gotschi, T.; Shi, T.; Kelly, F. J.; Cook, S.; Burney, P.; Forsberg, B.; Gauderman, J. W.; Hazenkamp, M. E.; Heinrich, J.; Jarvis, D.; Norback, D.; Payo-Losa, F.; Poli, A.; Sunyer, J.; Borm, P. J., Comparison of oxidative properties, light absorbance, total and elemental mass concentration of ambient PM<sub>2.5</sub> collected at 20 European sites. *Environ Health Perspect* **2006**, 114 (5), 684-90.
22. Vidrio, E.; Phuah, C. H.; Dillner, A. M.; Anastasio, C., Generation of Hydroxyl Radicals from Ambient Fine Particles in a Surrogate Lung Fluid Solution. *Environ. Sci. Technol.* **2009**, 43 (3), 922-927.
23. Wang, Y.; Arellanes, C.; Curtis, D. B.; Paulson, S. E., Probing the source of hydrogen peroxide associated with coarse mode aerosol particles in southern California. *Environ Sci Technol* **2010**, 44 (11), 4070-5.
24. Shi, T. M.; Schins, R. P. F.; Knaapen, A. M.; Kuhlbusch, T.; Pitz, M.; Heinrich, J.; Borm, P. J. A., Hydroxyl radical generation by electron paramagnetic resonance as a new method to monitor ambient particulate matter composition. *J. Environ. Monit.* **2003**, 5 (4), 550-556.
25. Shi, T.; Knaapen, A. M.; Begerow, J.; Birmili, W.; Borm, P. J. A.; Schins, R. P. F., Temporal variation of hydroxyl radical generation and 8-hydroxy-2'-deoxyguanosine formation by coarse and fine particulate matter. *Occup. Environ. Med.* **2003**, 60, 315-321.
26. Jeng, H. A., Chemical composition of ambient particulate matter and redox activity. *Environ. Monit. Assess.* **2010**, 169 (1-4), 597-606.
27. Park, S.; Nam, H.; Chung, N.; Park, J. D.; Lim, Y., The role of iron in reactive oxygen species generation from diesel exhaust particles. *Toxicol. Vitro* **2006**, 20 (6), 851-857.
28. See, S. W.; Wang, Y. H.; Balasubramanian, R., Contrasting reactive oxygen species and transition metal concentrations in combustion aerosols. *Environ. Res.* **2007**, 103 (3), 317-324.
29. Cheung, K. L.; Ntziachristos, L.; Tzankiozis, T.; Schauer, J. J.; Samaras, Z.; Moore, K. F.; Sioutas, C., Emissions of Particulate Trace Elements, Metals and Organic Species from Gasoline, Diesel, and Biodiesel Passenger Vehicles and Their Relation to Oxidative Potential. *Aerosol Sci. Technol.* **2010**, 44 (7), 500-513.

30. Valavanidis, A.; Fiotakis, K.; Bakeas, E.; Vlahogianni, T., Electron paramagnetic resonance study of the generation of reactive oxygen species catalysed by transition metals and quinoid redox cycling by inhalable ambient particulate matter. *Redox Rep.* **2005**, *10* (1), 37-51.
31. Daher, N.; Ning, Z.; Cho, A. K.; Shafer, M.; Schauer, J. J.; Sioutas, C., Comparison of the Chemical and Oxidative Characteristics of Particulate Matter (PM) Collected by Different Methods: Filters, Impactors, and BioSamplers. *Aerosol Sci. Technol.* **2011**, *45* (11), 1294-1304.
32. Majestic, B. J.; Schauer, J. J.; Shafer, M. M., Application of synchrotron radiation for measurement of iron red-ox speciation in atmospherically processed aerosols. *Atmos. Chem. Phys.* **2007**, *7*, 2475-2487.
33. Khachatryan, L.; Vejerano, E.; Lomnicki, S.; Dellinger, B., Environmentally Persistent Free Radicals (EPFRs). 1. Generation of Reactive Oxygen Species in Aqueous Solutions. *Environ. Sci. Technol.* **2011**, *45* (19), 8559-66.
34. Khachatryan, L.; Dellinger, B., Environmentally Persistent Free Radicals (EPFRs)-2. Are Free Hydroxyl Radicals Generated in Aqueous Solutions? *Environ. Sci. Technol.* **2011**, *45* (21), 9232-9239.
